# Supplementary material
Source: PubMed Central journal article supplement (PMC8363284)

## Supplemental Table 1

| <b>Antibody</b>   | <b>Cat#</b> | <b>Source</b>             |
|-------------------|-------------|---------------------------|
| Ac-H3K27          | 8173        | Cell Signaling Technology |
| Histone H3        | 4499        | Cell Signaling Technology |
| $\beta$ 2m        | ab75853     | Abcam                     |
| $\beta$ -actin    | 5125        | Cell Signaling Technology |
| p-STAT3           | 9145        | Cell Signaling Technology |
| STAT3             | 4904        | Cell Signaling Technology |
| Ac-STAT3          | 2523        | Cell Signaling Technology |
| Cleaved caspase-3 | 9661        | Cell Signaling Technology |
| H-2Kb             | 116511      | Biologend                 |
| PD-L1             | 17952-1-AP  | Proteintech               |

## Supplemental Table 2

| <b>Target</b> | <b>Clone</b> | <b>Source</b>  |
|---------------|--------------|----------------|
| CD4           | RM4-4        | BD Biosciences |
| CD8           | RPA-T8       | BD Biosciences |
| CD11b         | M1/70        | BD Biosciences |
| CD11c         | HL3          | BD Biosciences |
| CD44          | IM7          | BD Biosciences |
| CD45          | 30-F11       | BD Biosciences |
| CD62L         | MEL-14       | BioLegend      |
| FoxP3         | MF-14        | BioLegend      |
| Ly6c          | HK1.4        | BioLegend      |
| Ly6g          | 1A8-Ly6g     | ThermoFisher   |
| CD3           | 17A2         | BioLegend      |
| CD19          | 6D5          | BioLegend      |

## Supplemental Table 3

| <b>Genes</b> | <b>Forward primers</b>                  | <b>Reverse primers</b>                     |
|--------------|-----------------------------------------|--------------------------------------------|
| Car12        | 5'-ATA GAC CTA CAT AGC GAC AC-3'        | 5'-CTG CTC TGT AGT GGT GAG GC-3'           |
| Grin1        | 5'-CAC TGT TCA AGA GGG C-3'             | 5'- GCC ATC ACT CAT TGT GGG C -3'          |
| Has2         | 5'-CTT ATT CCA GTG TCC GC-3'            | 5'- CCA TGT CAT ACT GTT GTC CCT TCT TC -3' |
| Cyp3a13      | 5'-GGA GAT TGT GGC TCA GTC AGT TAT C-3' | 5'-GGC AGA GCC GCA TCA ATT TC-3'           |
| Ggt6         | 5'-GTG GTA CAT CCT CAT GCA ATA GGC-3'   | 5'-CAA ATG CAG AGC AGG CAG AC-3'           |
| Slc5a1       | 5'-GTC AGA AAT ACT GCG GCA CAC C-3'     | 5'-CCG GAT CTT GGT GTA GAT GTC C-3'        |

## Supplemental Table 4

| <b>Genes</b> | <b>Peptides</b> |
|--------------|-----------------|
| Car12        | IATPFSMML       |
| Grin1        | TGPLFKRALM      |
| Has2         | VSAWFTILL       |
| Ova          | SIINFEKL        |

# Supplemental Figure 1

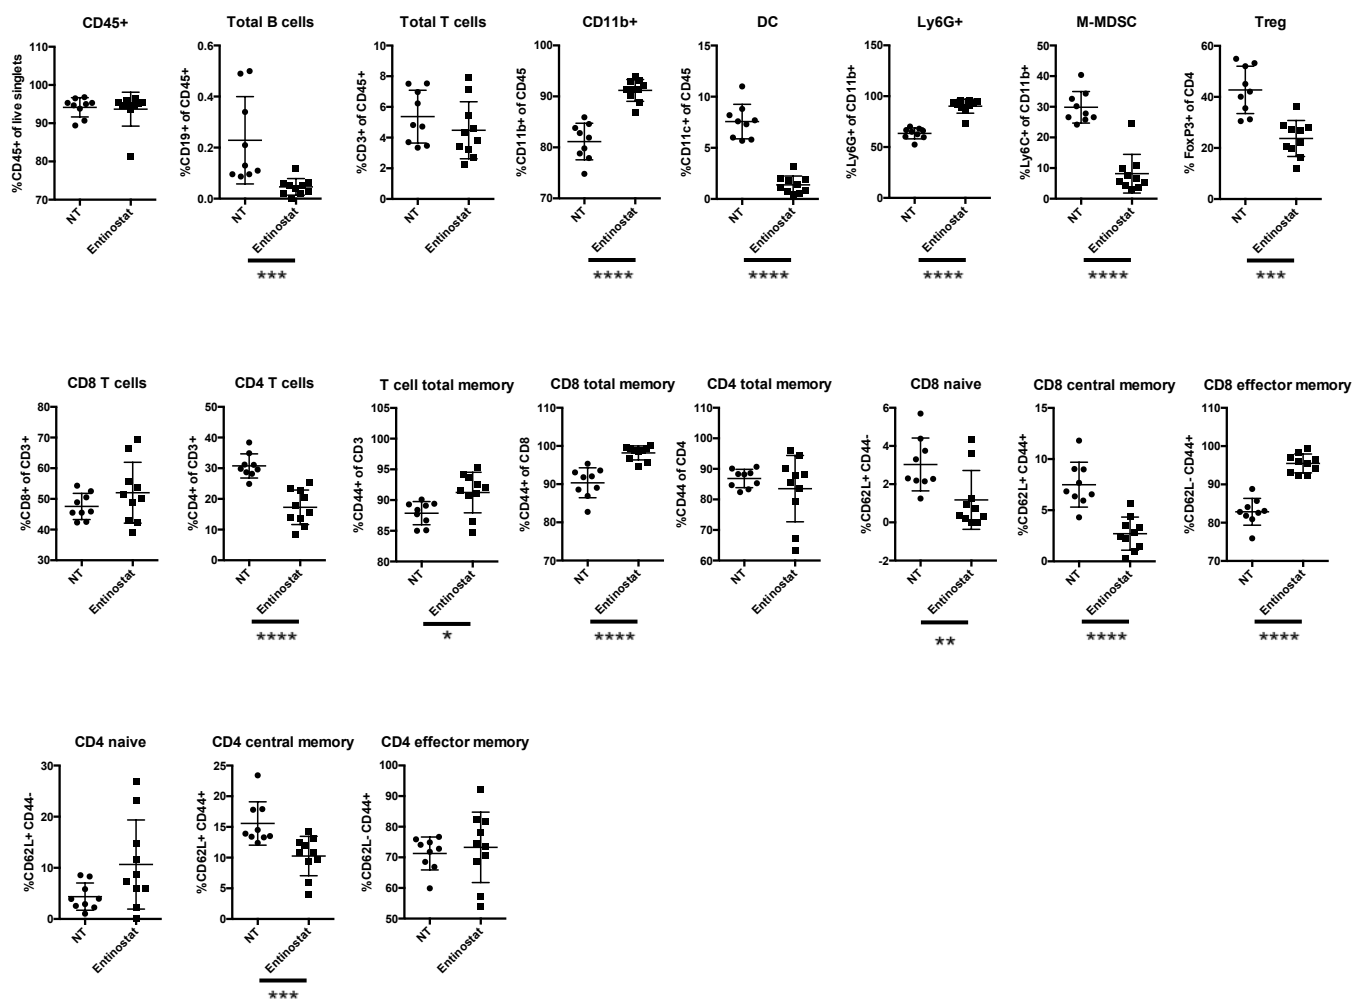

# Supplemental Figure 2

A

## Myeloid populations in BBN963 and UPPL1541

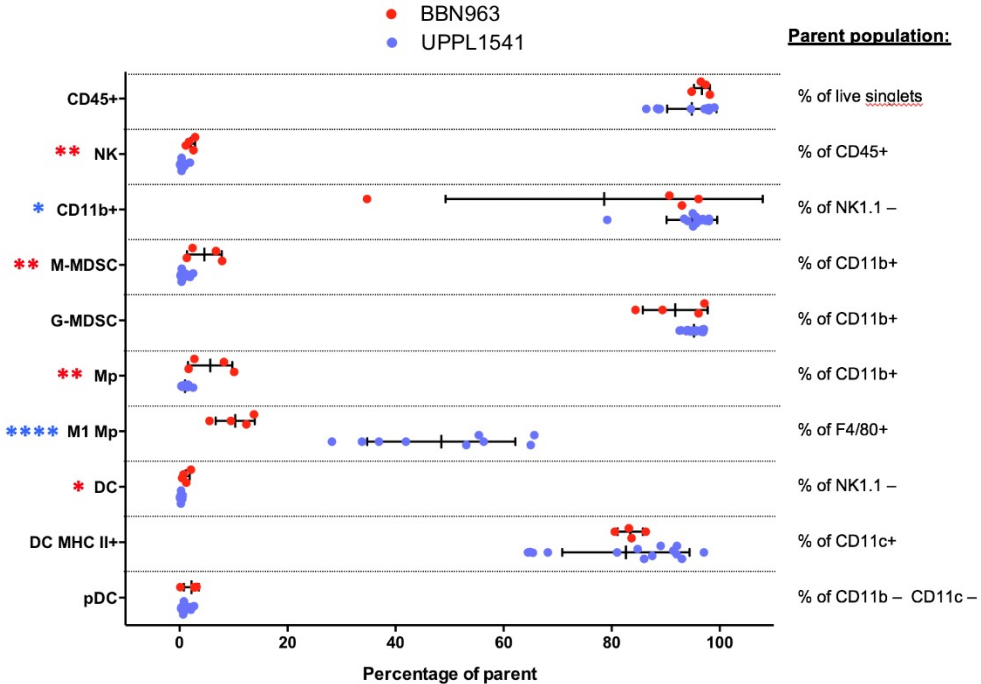

B

## Myeloid panel gating scheme

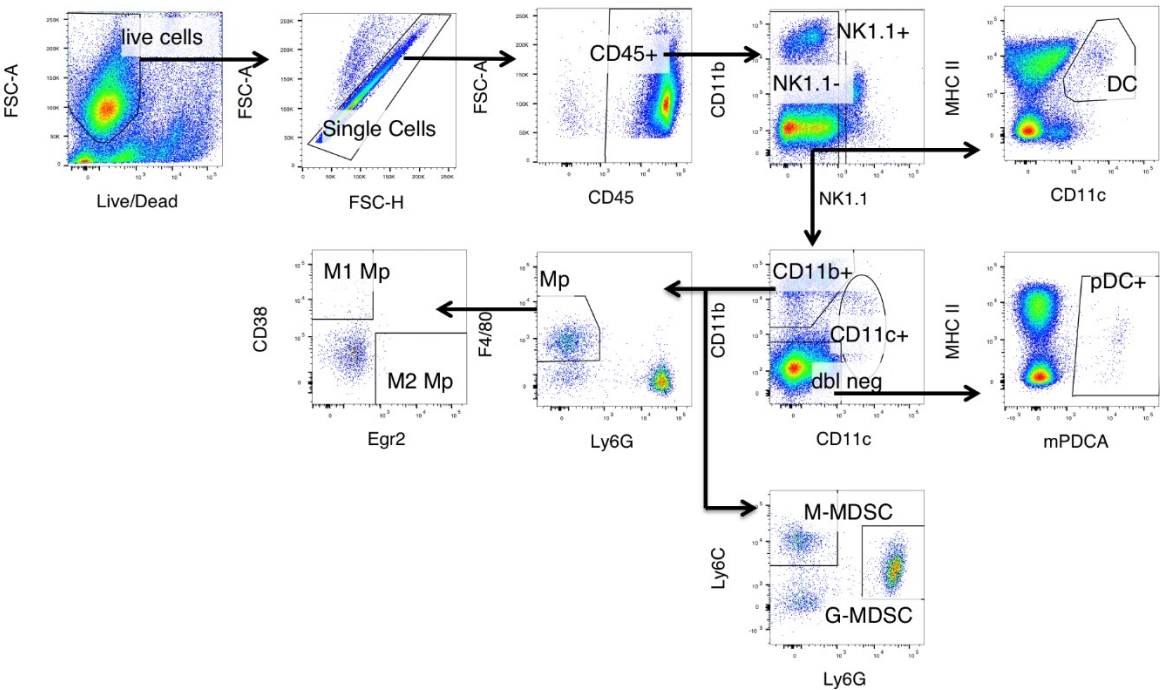

# Supplemental Figure 3

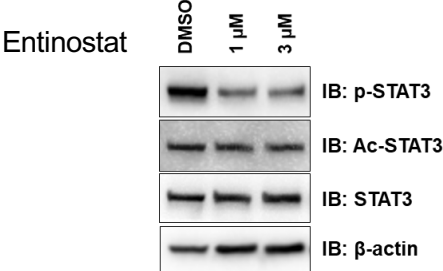

# Supplemental Figure 4

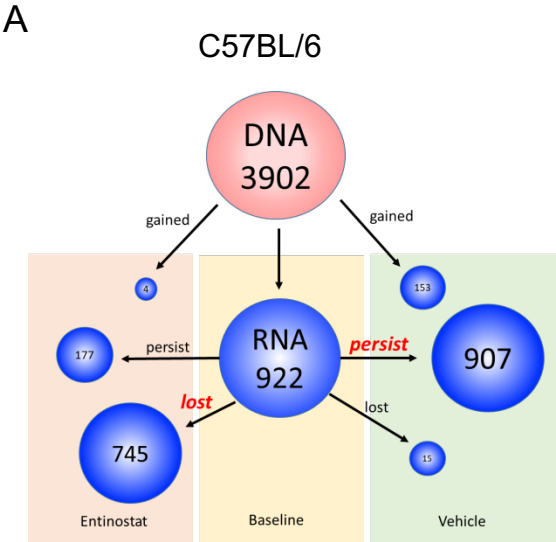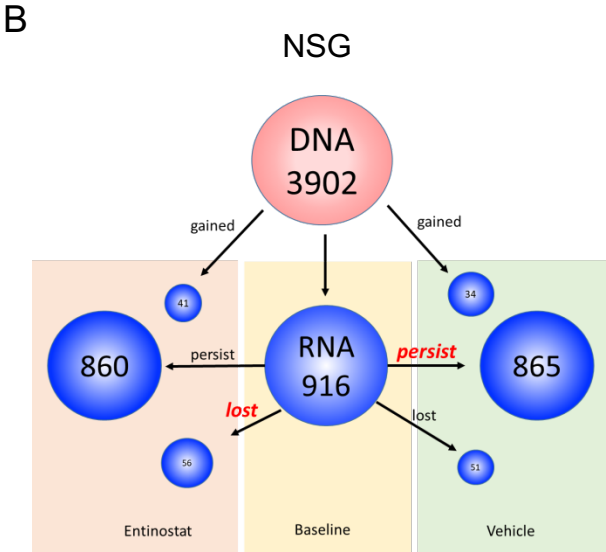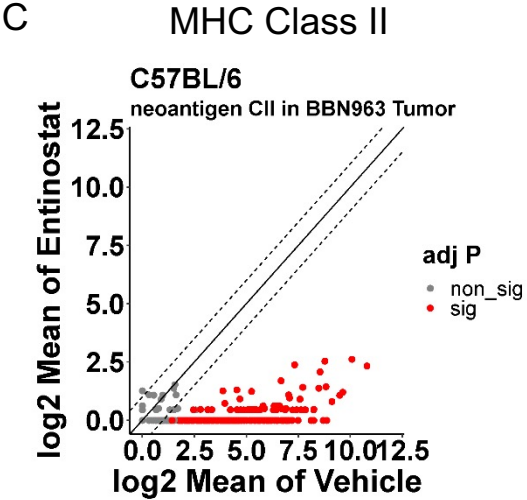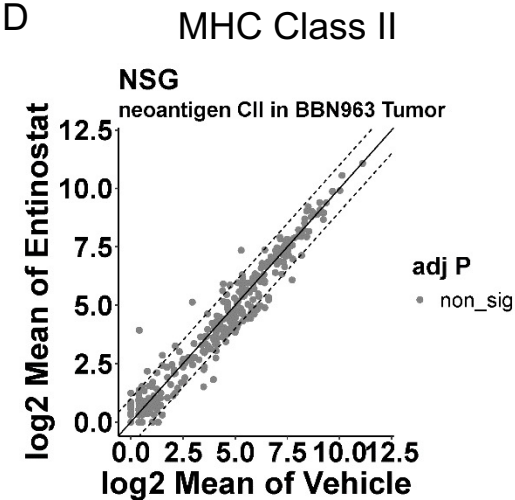

# Supplemental Figure 5

A

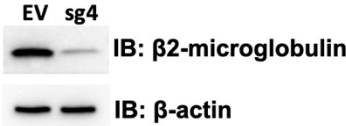

B

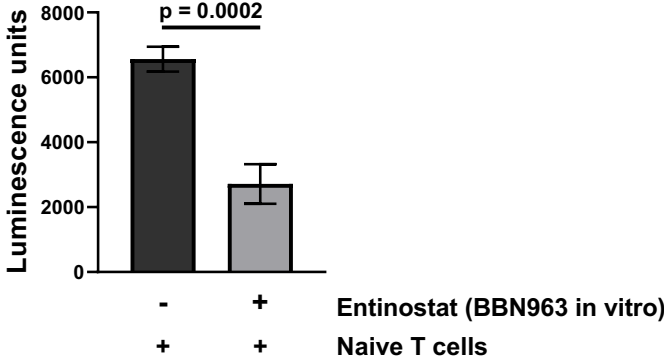

C

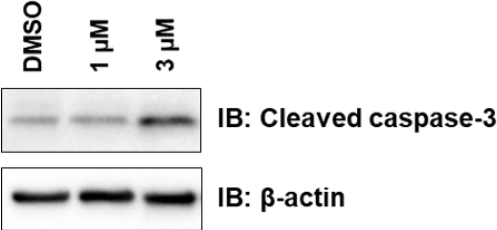

Supplemental Figure 6

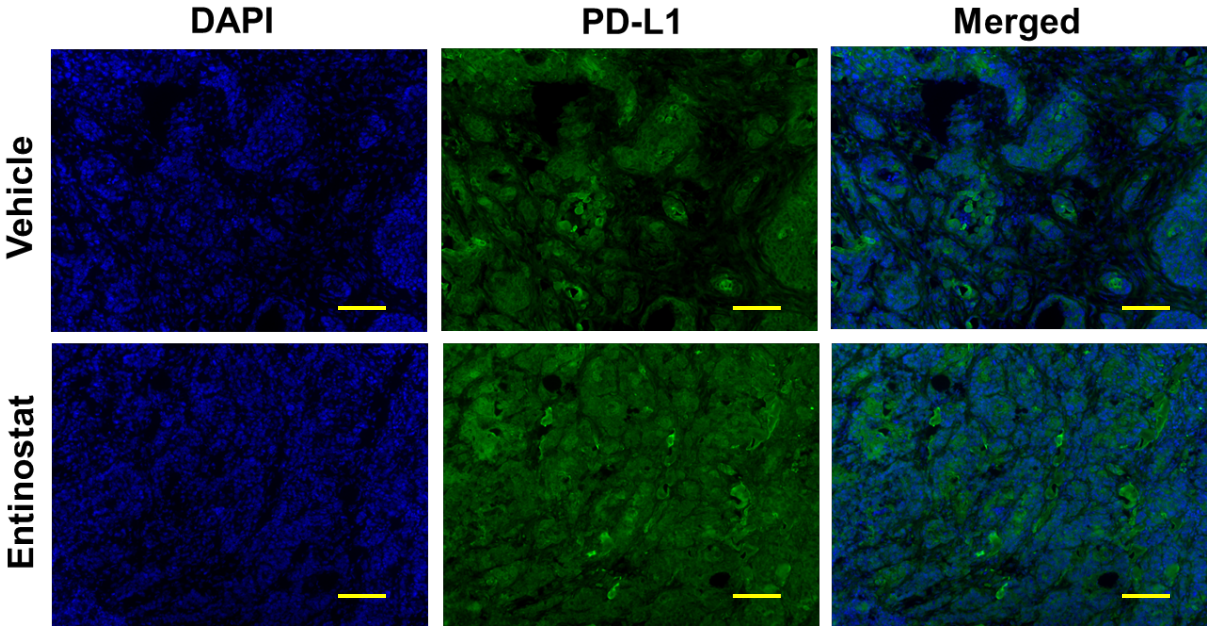



Supplemental Figure 7

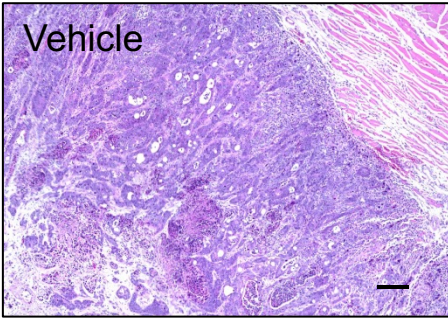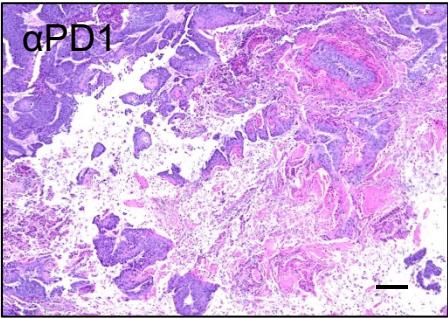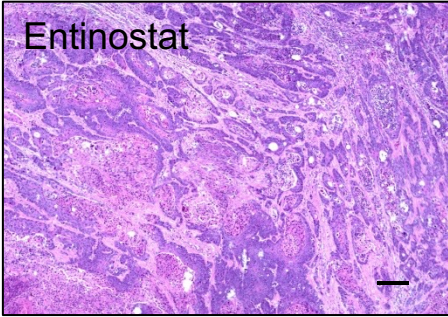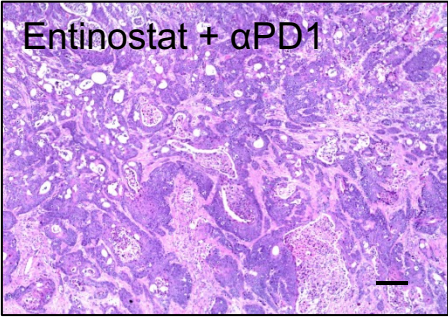

# Supplemental Figure 8

## A UPPL1541

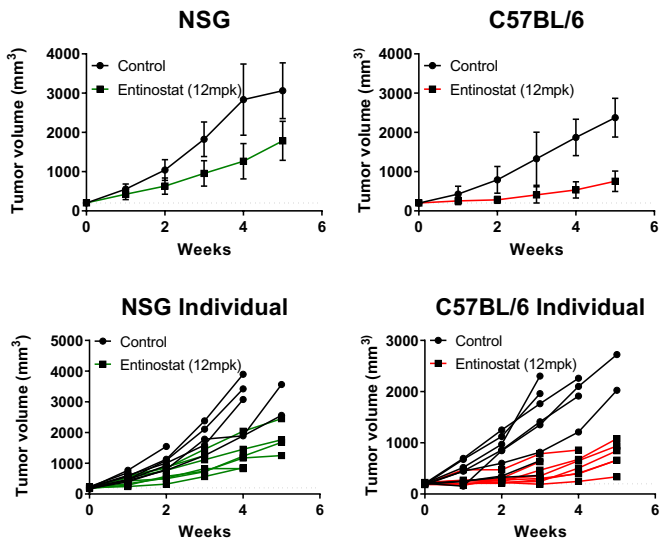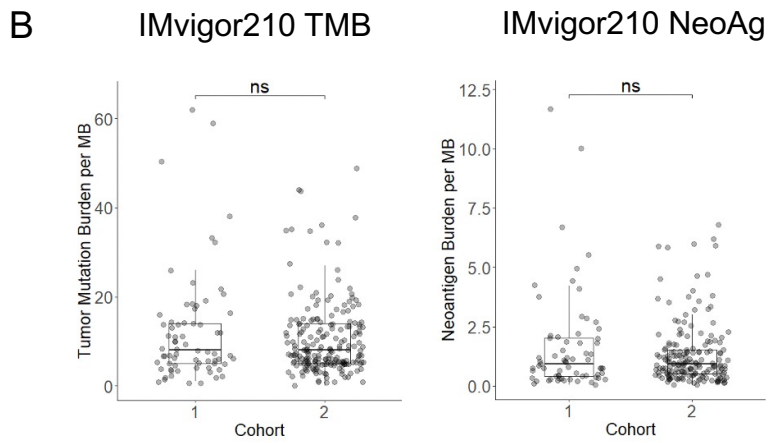

Supplement: jci-131-138560-s108.pdf [file jci-131-138560-s108.pdf]
